# Supplementary material for: Pickering high internal phase emulsions stabilized by worm-like polymeric nanoaggregates
Source: Royal Society of Chemistry journal article supplement (doi:10.1039/c7py00912g), 2017-01-01
Supplement: c7py00912g1.pdf [file c7py00912g1.pdf]

## *Supporting Information*

### **Pickering High Internal Phase Emulsions Stabilized by Worm-Like Polymeric Nanoaggregates**

Qi Zhang,<sup>a</sup> Chengjian Wang,<sup>a</sup> Milin Fu,<sup>a</sup> Jianli Wang,<sup>a,\*</sup> Shiping Zhu<sup>b,\*</sup>

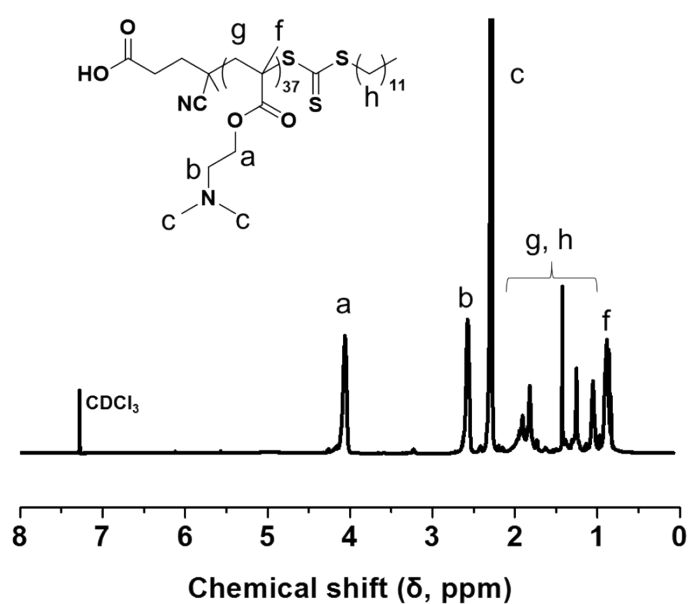

**Figure S1.** <sup>1</sup>H NMR spectrum of PDMA<sub>37</sub> macro CTA (recorded in CDCl<sub>3</sub>).

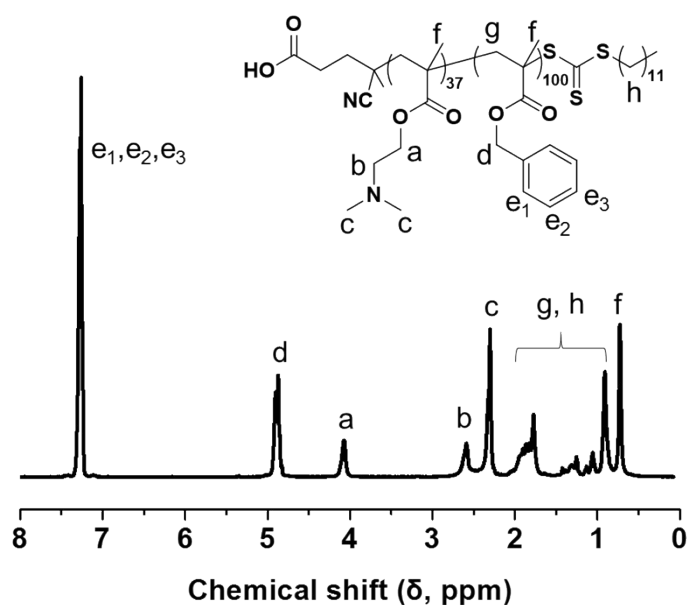

**Figure S2.**  $^1\text{H}$  NMR spectrum of PDMA<sub>37</sub>-*b*-PBzMA<sub>96</sub> block copolymer (recorded in CDCl<sub>3</sub>).

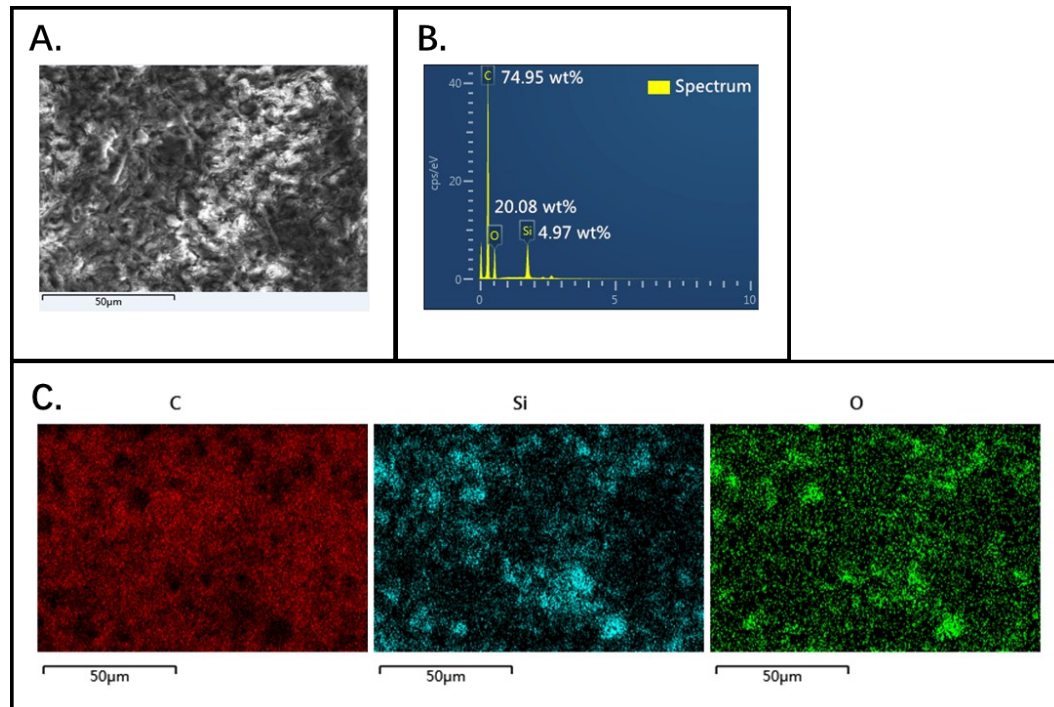

**Figure S3.** Tablet compressing Backscattered electron images of 3D hierarchical porous monoliths (A), Element composition (B) and their corresponding EDX elemental maps (C).
